# Supplementary material
Source: publisher site journal article supplement (https://www.dovepress.com/get_supplementary_file.php?f=372501.docx)
Supplement: Supplementary file 1 [file get_supplementary_file.php]

**Supplementary Table S1: List of most acknowledgeable Research Assistants**

| Name | Affiliation |
| --- | --- |
| 1. Md. Easin Arafat | Tejgaon College, National University of Bangladesh, Gazipur- 1704, Bangladesh |
| 1. Sunzida Akter Eva | Tejgaon College, National University of Bangladesh, Gazipur- 1704, Bangladesh |
| 1. Sk. Nafia Nafiz Rimi | Tejgaon College, National University of Bangladesh, Gazipur- 1704, Bangladesh |
| 1. Ishrat Jahan | Tejgaon College, National University of Bangladesh, Gazipur- 1704, Bangladesh |
| 1. Mahedi Hasan Shabuj | Tejgaon College, National University of Bangladesh, Gazipur- 1704, Bangladesh |
| 1. Anuradha Kalower Medha | Tejgaon College, National University of Bangladesh, Gazipur- 1704, Bangladesh |
| 1. Abdullah Al Mahmud | Tejgaon College, National University of Bangladesh, Gazipur- 1704, Bangladesh |
| 1. Raina Masnoon Badhan | Tejgaon College, National University of Bangladesh, Gazipur- 1704, Bangladesh |
| 1. Khalid Hasan Naiem | Tejgaon College, National University of Bangladesh, Gazipur- 1704, Bangladesh |
| 1. Nusrat Zahan Bhuiyan | Tejgaon College, National University of Bangladesh, Gazipur- 1704, Bangladesh |
| 1. Jannatun Nayeem Priyanka | Tejgaon College, National University of Bangladesh, Gazipur- 1704, Bangladesh |
| 1. Sifat Shahriar | Tejgaon College, National University of Bangladesh, Gazipur- 1704, Bangladesh |
| 1. Omme Jamila Sara | Tejgaon College, National University of Bangladesh, Gazipur- 1704, Bangladesh |
| 1. Md. Ikbal Hossain | Begum Rabeya Khatun Chowdhury Nursing College, Sylhet-3100, Bangladesh |
| 1. Toyabur Rahaman Bhuya | Sylhet M. A. G. Osmani Medical College, Dhaka-1000, Bangladesh |
| 1. Fahima Begum | Sylhet Nursing College, Sylhet-3100, Bangladesh |
| 1. Md. Ajijur Rahman | Begum Rabeya Khatun Chowdhury Nursing College, Sylhet-3100, Bangladesh |
| 1. Bubli Moni Dash | Begum Rabeya Khatun Chowdhury Nursing College, Sylhet-3100, Bangladesh |
| 1. Rumi Begum | Begum Rabeya Khatun Chowdhury Nursing College, Sylhet-3100, Bangladesh |
| 1. Jamil Ahmed | Sylhet Women's Nursing College, Sylhet-3100, Bangladesh |
